# Supplementary material
Source: PubMed Central journal article supplement (PMC4044849)
Supplement: supp_pp.113.233932_233932Supplemental_Figures.pdf [file supp_pp.113.233932_233932Supplemental_Figures.pdf]

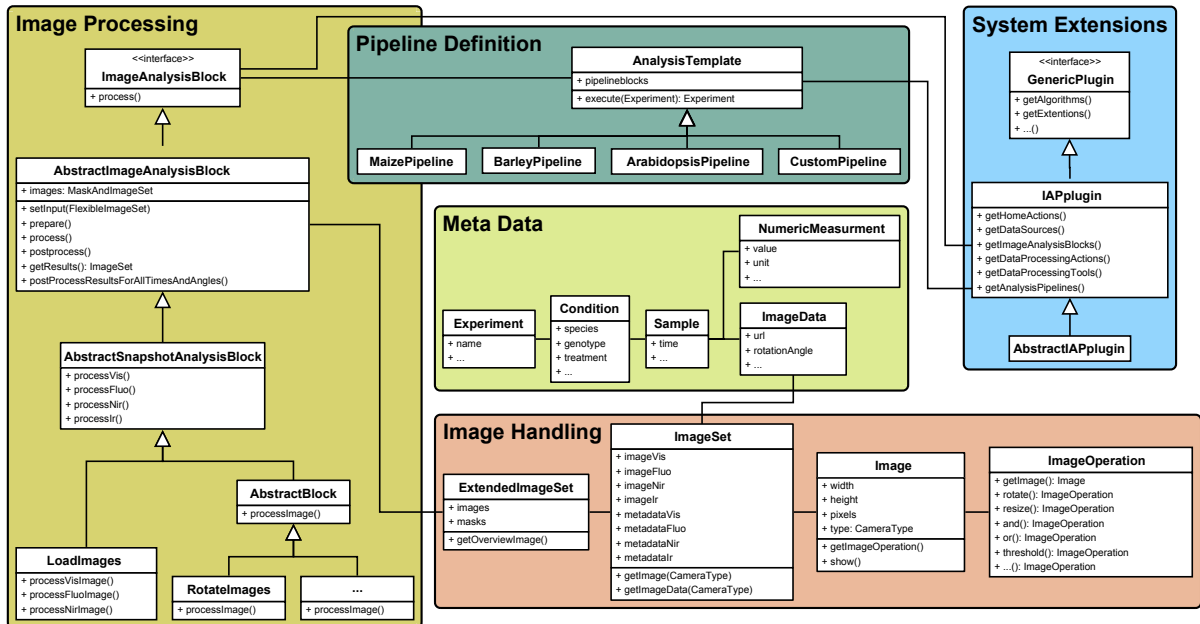

**Figure S1: UML diagram depicting the architecture of the IAP system.** Boxes colored with different background represent the main components of the system, which are (1) pipeline definition: defining analysis pipeline templates, (2) image processing: providing block definition, (3) image handling: implementing the image operations, (4) meta-data: describing related information for a given experiment and (5) system extensions: providing the possibility of defining IAP plugins. The relationship of these components is indicated with lines.

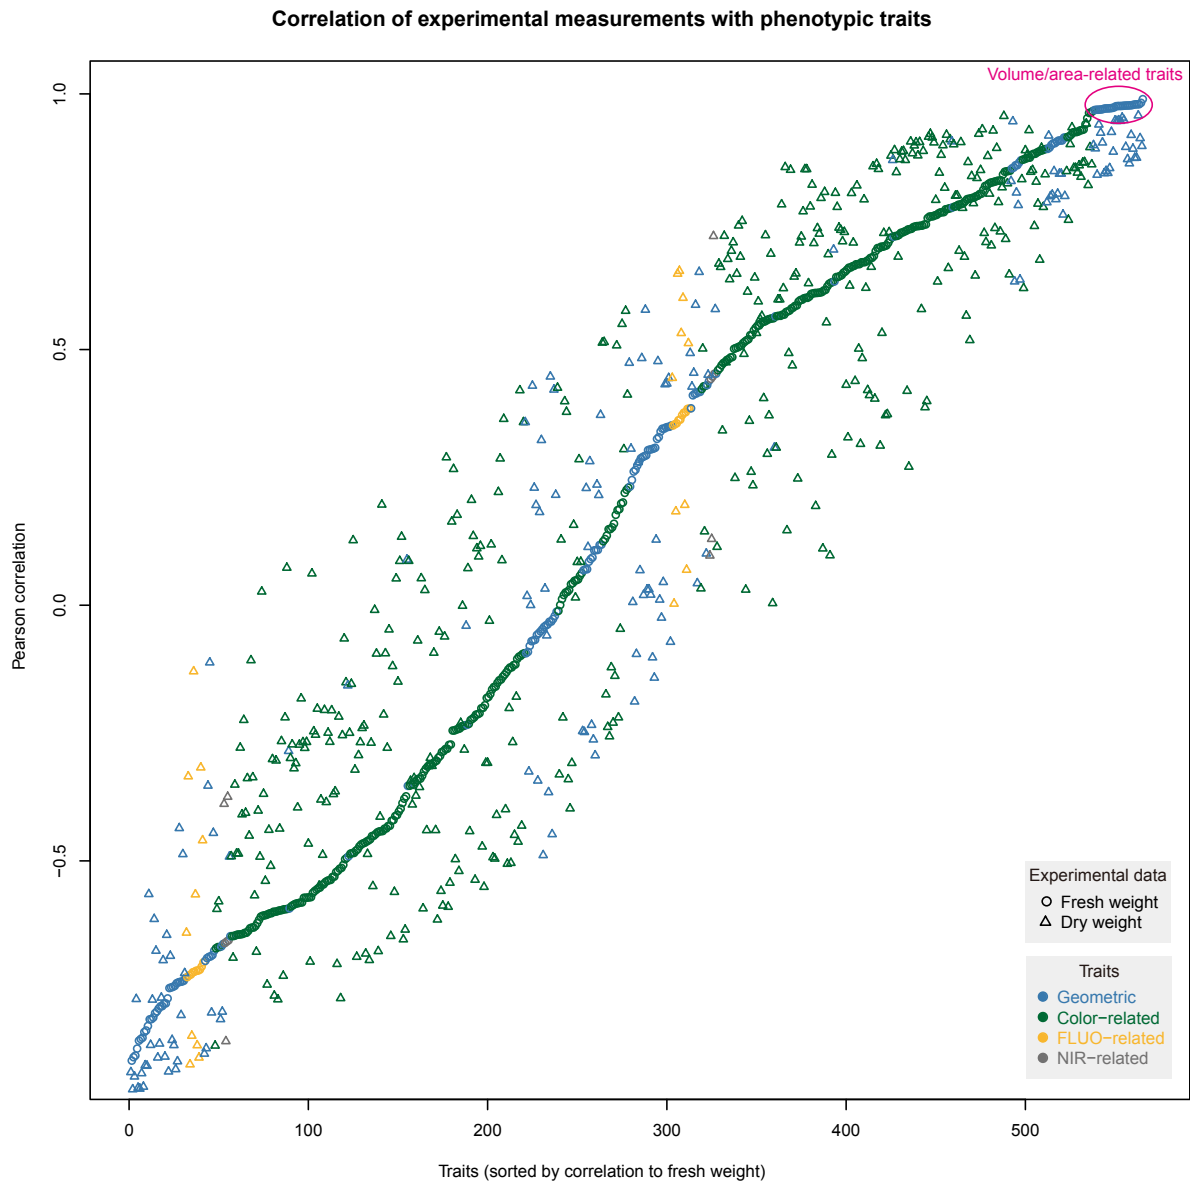

**Figure S2: Correlation analysis of phenotypic traits.** Experimental measurements (the fresh and dry weight) were correlated to the values of all phenotypic traits. The x-axis indicates the list of traits, which are sorted according to their correlation coefficient to the fresh weight. Traits are colored according to their classification.

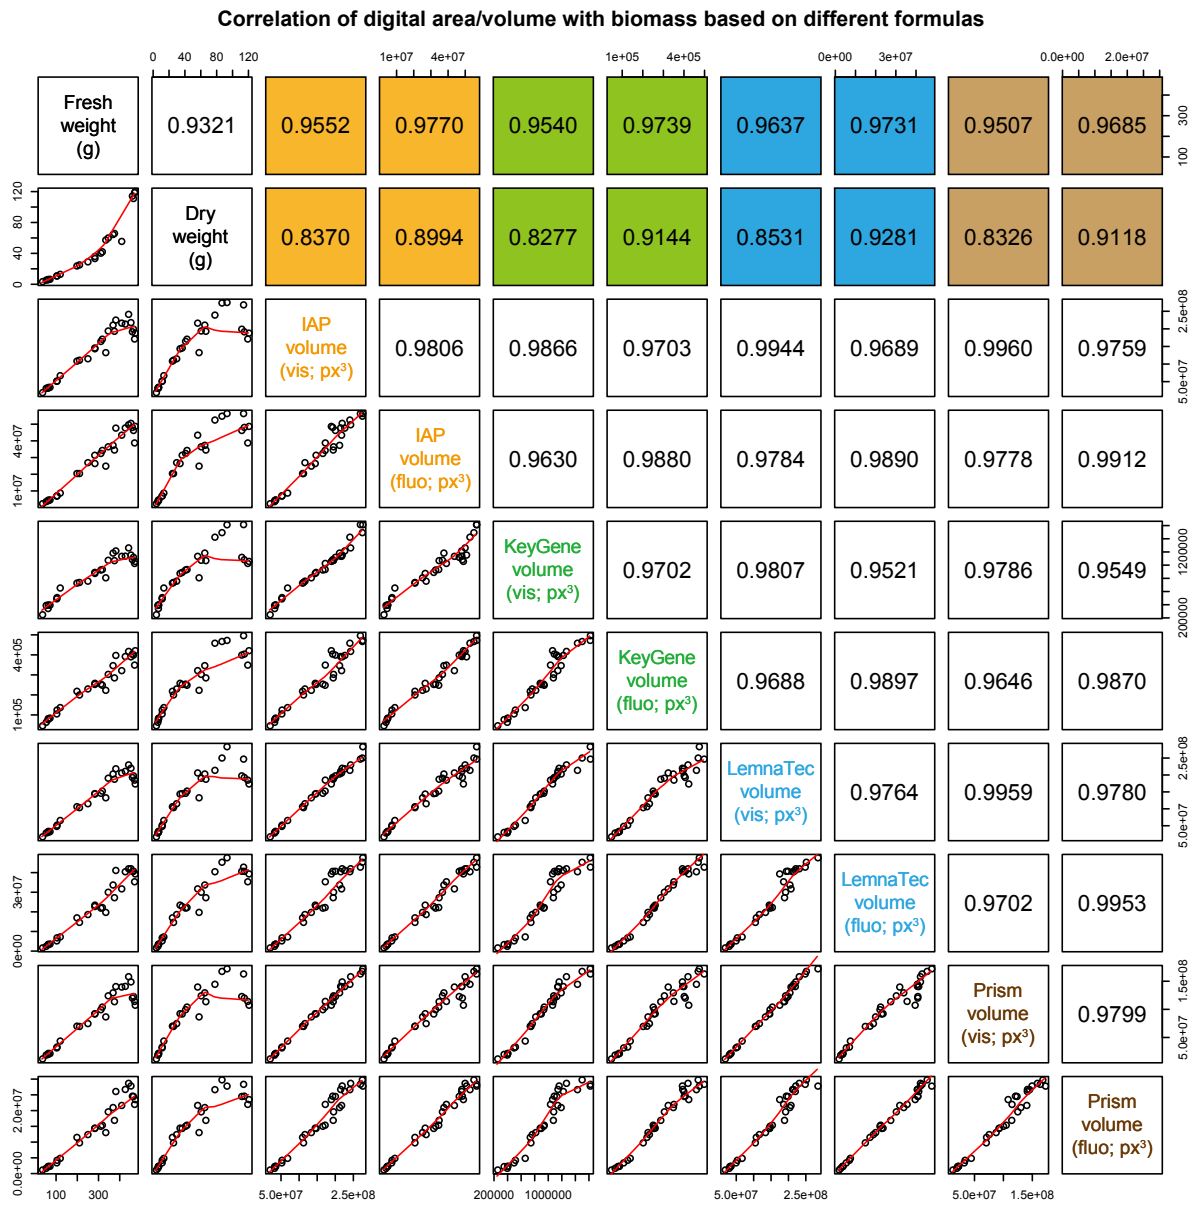

**Figure S3: Correlation of the digital volume with experimental measurements of biomass (fresh and dry weight).** The volume was calculated by four different formulas (IAP, KeyGene, LemnaTec and Prism) from visible (vis) and fluorescence (fluo) images. Shown values represent Pearson correlation coefficients ( $r$ ).
